# Supplementary material
Source: PubMed Central journal article supplement (PMC10901678)
Supplement: NIHMS1966318-supplement-Peer_review_history__as_published_with_article.pdf [file NIHMS1966318-supplement-Peer_review_history__as_published_with_article.pdf]

# Graft-Host Coupling Changes Can Lead to Engraftment Arrhythmia: A Computational Study

Chelsea E Gibbs, Silvia Marchianó, Kelly Zhang, Xiulan Yang, Charles E Murry, and Patrick M Boyle  
DOI: 10.1113/JP284244

Corresponding author(s): Patrick Boyle ([pmjboyle@uw.edu](mailto:pmjboyle@uw.edu))

The referees have opted to remain anonymous.

---

## Review Timeline:

|                     |             |
|---------------------|-------------|
| Submission Date:    | 06-Jan-2023 |
| Editorial Decision: | 24-Jan-2023 |
| Revision Received:  | 14-Mar-2023 |
| Editorial Decision: | 28-Mar-2023 |
| Revision Received:  | 29-Mar-2023 |
| Accepted:           | 30-Mar-2023 |

---

Senior Editor: Peter Kohl

Reviewing Editor: Eleonora Grandi

## Transaction Report:

(Note: With the exception of the correction of typographical or spelling errors that could be a source of ambiguity, letters and reports are not edited. Depending on transfer agreements, referee reports obtained elsewhere may or may not be included in this compilation. Referee reports are anonymous unless the Referee chooses to sign their reports.)

Dear Dr Boyle,

Re: JP-RP-2023-284244 "Graft-Host Coupling Changes Can Lead to Engraftment Arrhythmia: A Computational Study" by Chelsea E Gibbs, Silvia Marchianó, Kelly Zhang, Xiulan Yang, Charles E Murry, and Patrick M Boyle

Thank you for submitting your manuscript to The Journal of Physiology. It has been assessed by a Reviewing Editor and by 2 expert referees and we are pleased to tell you that it is potentially acceptable for publication following satisfactory major revision.

Please advise your co-authors of this decision as soon as possible.

The referee reports are copied at the end of this email.

Please address all the points raised and incorporate all requested revisions or explain in your Response to Referees why a change has not been made. We hope you will find the comments helpful and that you will be able to return your revised manuscript within 9 months. If you require longer than this, please contact journal staff: [jp@physoc.org](mailto:jp@physoc.org). Please note that this letter does not constitute a guarantee for acceptance of your revised manuscript.

Your revised manuscript should be submitted online using the link in your Author Tasks Link Not Available. This link is accessible via your account as Corresponding Author; it is not available to your co-authors. If this presents a problem, please contact journal staff ([jp@physoc.org](mailto:jp@physoc.org)). Image files from the previous version are retained on the system. Please ensure you replace or remove any files that are being revised.

If you do not wish to submit a revised version of your manuscript, you must inform our journal staff ([jp@physoc.org](mailto:jp@physoc.org)) or reply to this email to request withdrawal. Please note that a manuscript must be formally withdrawn from the peer review process at one journal before it may be submitted to another journal.

**TRANSPARENT PEER REVIEW POLICY:** To improve the transparency of its peer review process The Journal of Physiology publishes online, as supporting information, the peer review history of all articles accepted for publication. Readers will have access to decision letters, including Editors' comments and referee reports, for each version of the manuscript, as well as any author responses to peer review comments. Referees can decide whether or not they wish to be named on the peer review history document.

**ABSTRACT FIGURES:** Authors are expected to use The Journal's premium BioRender account to create/redraw their Abstract Figures. Information on how to access this account is here: <https://physoc.onlinelibrary.wiley.com/journal/14697793/biorender-access>.

This will enable Authors to create and download high-resolution figures. If authors have used the free BioRender service, they can use the instructions provided in the link above to download a high-resolution version suitable for publication.

The link provided should only be used for the purposes of this submission. Authors will be charged for figures created on this account if they are not related to this manuscript submission.

**LANGUAGE EDITING AND SUPPORT FOR PUBLICATION:** If you would like help with English language editing, or other article preparation support, Wiley Editing Services offers expert help, including English Language Editing, as well as translation, manuscript formatting, and figure formatting at [www.wileyauthors.com/eoo/preparation](http://www.wileyauthors.com/eoo/preparation). You can also find resources for Preparing Your Article for general guidance about writing and preparing your manuscript at [www.wileyauthors.com/eoo/prepresources](http://www.wileyauthors.com/eoo/prepresources).

**REVISION CHECKLIST:**

Check that your Methods section conforms to journal policy: [https://jp.msubmit.net/cgi-bin/main.plex?form\\_type=display\\_requirements#methods](https://jp.msubmit.net/cgi-bin/main.plex?form_type=display_requirements#methods)

Check that data presented conforms to the statistics policy: [https://jp.msubmit.net/cgi-bin/main.plex?form\\_type=display\\_requirements#statistics](https://jp.msubmit.net/cgi-bin/main.plex?form_type=display_requirements#statistics)

Upload a full Response to Referees file. To create your 'Response to Referees' copy all the reports, including any comments from the Senior and Reviewing Editors, into a Microsoft Word, or similar, file and respond to each point, using font or background colour to distinguish comments and responses and upload as the required file type.

Please upload two versions of your manuscript text: one with all relevant changes highlighted and one clean version with no changes tracked. The manuscript file should include all tables and figure legends, but each figure/graph should be uploaded as separate, high-resolution files.

You may also upload:

- 'Potential Cover Art' for consideration as the issue's cover image

- Appropriate Supporting Information (Video, audio or data set: see [https://jp.msubmit.net/cgi-bin/main.plex?form\\_type=display\\_requirements#supp](https://jp.msubmit.net/cgi-bin/main.plex?form_type=display_requirements#supp)).

We look forward to receiving your revised submission.

If you have any queries, please reply to this email and we will be pleased to advise.

Yours sincerely,

Peter Kohl  
Senior Editor  
The Journal of Physiology

-----  
REQUIRED ITEMS:

-Author photo and profile. First (or joint first) authors are asked to provide a short biography (no more than 100 words for one author or 150 words in total for joint first authors) and a portrait photograph. These should be uploaded and clearly labelled with the revised version of the manuscript. See [Information for Authors](#) for further details.

-You must start the Methods section with a paragraph headed [Ethical Approval](#). A detailed explanation of journal policy and regulations on animal experimentation is given in [Principles and standards for reporting animal experiments in The Journal of Physiology and Experimental Physiology](#) by David Grundy J Physiol, 593: 2547-2549. doi:10.1113/JP270818. ). A checklist outlining these requirements and detailing the information that must be provided in the paper can be found at: <https://physoc.onlinelibrary.wiley.com/hub/animal-experiments>. Authors should confirm in their Methods section that their experiments were carried out according to the guidelines laid down by their institution's animal welfare committee, and conform to the principles and regulations as described in the Editorial by Grundy (2015). The Methods section must contain details of the anaesthetic regime: anaesthetic used, dose and route of administration and method of killing the experimental animals.

-Your manuscript must include a complete [Additional Information section](#)

-Please upload separate high-quality [figure files](#) via the submission form.

-Please ensure that any tables are in Word format and are, wherever possible, embedded in the article file itself.

-A Statistical Summary Document, summarising the statistics presented in the manuscript, is required upon revision. It must be on the Journal's template, which can be downloaded from the link in the Statistical Summary Document section here: [https://jp.msubmit.net/cgi-bin/main.plex?form\\_type=display\\_requirements#statistics](https://jp.msubmit.net/cgi-bin/main.plex?form_type=display_requirements#statistics)

-Papers must comply with the Statistics Policy [https://jp.msubmit.net/cgi-bin/main.plex?form\\_type=display\\_requirements#statistics](https://jp.msubmit.net/cgi-bin/main.plex?form_type=display_requirements#statistics)

In summary:

-If  $n$  {less than or equal to} 30, all data points must be plotted in the figure in a way that reveals their range and distribution. A bar graph with data points overlaid, a box and whisker plot or a violin plot (preferably with data points included) are acceptable formats.

-If  $n > 30$ , then the entire raw dataset must be made available either as supporting information, or hosted on a not-for-profit repository e.g. FigShare, with access details provided in the manuscript.

- $n$  clearly defined (e.g.  $x$  cells from  $y$  slices in  $z$  animals) in the Methods. Authors should be mindful of pseudoreplication.

-All relevant  $n$  values must be clearly stated in the main text, figures and tables, and the Statistical Summary Document (required upon revision)

-The most appropriate summary statistic (e.g. mean or median and standard deviation) must be used. Standard Error of the Mean (SEM) alone is not permitted.

-Exact p values must be stated. Authors must not use 'greater than' or 'less than'. Exact p values must be stated to three significant figures even when 'no statistical significance' is claimed.

-Statistics Summary Document completed appropriately upon revision

-Please include an Abstract Figure file, as well as the figure legend text within the main article file. The Abstract Figure is a piece of artwork designed to give readers an immediate understanding of the research and should summarise the main conclusions. If possible, the image should be easily 'readable' from left to right or top to bottom. It should show the physiological relevance of the manuscript so readers can assess the importance and content of its findings. Abstract Figures should not merely recapitulate other figures in the manuscript. Please try to keep the diagram as simple as possible and without superfluous information that may distract from the main conclusion(s). Abstract Figures must be provided by authors no later than the revised manuscript stage and should be uploaded as a separate file during online submission labelled as File Type 'Abstract Figure'. Please ensure that you include the figure legend in the main article file. All Abstract Figures should be created using BioRender. Authors should use The Journal's premium BioRender account to export high-resolution images. Details on how to use and access the premium account are included as part of this email.

-----  
EDITOR COMMENTS

Reviewing Editor:

Both reviewers comment on an interesting study that provides new, clinically-relevant insight into the effects of scar and graft-host connectivity on engraftment arrhythmias. The revision should clarify the reviewers' queries, mainly addressing potential limitations and improving description of the methodology. Please also follow the JP principles and standards for reporting animal experiments.

Senior Editor:

Please add a statement explaining ethical review of animal-derived samples used in this investigation.

-----  
REFEREE COMMENTS

Referee #1:

The authors performed a computational study investigating the effect of graft-host connectivity and graft conductivity on graft-initiated arrhythmias in human pluripotent stem cell-derived cardiomyocytes grafts in the infarcted ventricle. The study is well presented, and the aims are clear. The results are interesting and provide novel insight into the effect of scar and graft-host connectivity on arrhythmias, with potentially important clinical implications. However, there are a few points that the authors should clarify:

1. The resting membrane potential the authors obtained ( $\sim -72$  mV) is not consistent with the measured values stated at line 182 ( $-68$  mV,  $-57$  mV). This should either be addressed, or at least added as a limitation to the study, as the rest membrane potential might have important effects on propagation.
2. The authors should perform simulations with slow but conducting scar because that might affect the conclusion of the study, since graft conductivity and scar presence seem to have quite a significant effect on graft-initiated activation.
3. The authors should also mention in the limitations that they did not consider border zone tissue around the scar and that 3D modelling, while more expensive, might show different vulnerable windows and change the results significantly.
4. Do graft myocytes undergo any physiological changes when they become more mature? If not, the authors could provide a reference for that. If not, this should also be listed as a limitation of the study, as the only temporal factor included in the study is increased graft-host connectivity.
5. The manuscript should undergo careful proof-reading.

Minor points:

1. Title: leasd should be lead. This is not correct at line 1 but it is correct in the title page.

2. Line 51: unclear what the authors mean by 'spatial coordinates'. Maybe say location, and add 'location especially relative to scar'.
3. Line 73: 'serious but transitory' could maybe be changed to 'transitory but serious'
4. Line 78: remove comma after hPSC-CM
5. Line 87-91: this sentence would benefit from being rephrased as it is a bit convoluted and hard to follow
6. Figure 1A, left: it might be useful to add a zoomed in area of the graft region
7. The authors should provide how many nodes and elements each model had (for instance at line 130 where they state the mesh resolution)
8. Line 165: 'use' should be 'used'
9. Line 169: 'island-by-island-basis' is unclear at this point. It becomes clearer when looking at Figure 6 where all models are shown, and the reader can clearly appreciate that each model has many islands. This is not clear in Figure 1C, as the model the authors show does not have many islands. Also, the authors might consider changing the blue-green color combination, as the colors can be difficult to distinguish at times.
10. Line 178: can the authors please specify what species the Kernik model was originally developed for? Human, NPH,...
11. Line 180-181: the authors should provide some references for experimental data supporting their (1) claim about faster intrinsic rate
12. Line 182: the word 'heart' is missing after transplanted and maybe 'more positive minimum diastolic potential' should be rewritten as 'less negative minimum diastolic potential'
13. Line 182: -57 mV and -68 mV should be swapped
14. Line 184-189: this sentence is very difficult to follow. Also, the PCR methods and results should be moved from Line 232 to Line 159, as it is a bit out of context where it is now. Moving it to an earlier point in the manuscript would also provide better context for point (3) at line 184
15. Line 196: is 1.9 Hz frequency consistent with any experimental data? The authors should provide a reference for this
16. Line 199: the authors should specify how the cell models were initialised before running the simulations at the tissue scale. Were the modified Kernik and the Ten Tusscher model ran for a number of beats to reach a near steady state?
17. Line 230: just for clarification, the authors should specify that 'maturity' refers to the percentage of host-graft connectivity
18. Line 233: 'were' should be 'was'
19. Line 282: remove the comma after 'myocardium'
20. Line 287: 'isolate' should be 'isolation'
21. Line 292: the '.' After 'For this set of simulations' should be a comma
22. Line 299: the orange dots in Figure 6 are very difficult to see. Maybe an arrow would be more visible?
23. Line 303: remove comma after 'Similarly'
24. Line 306: in the table caption, the table does not present 'statistics' but just the 'model characteristics'
25. Line 314-316: this sentence is hard to follow. Please rephrase
26. Line 321: WOV is already defined as an abbreviation in the methods
27. Figure 7: what does the color on the dots mean? If it does not have any meaning, then the dots should all be the same color. A similar figure should also be shown for Model 5, as that also seemed to be an interesting case
28. Line 358: 'was' should be 'we' and 'see' should be 'saw'
29. Line 368: 'for all conductivities' please add 'of the grafts', as otherwise it is unclear what connectivity the authors are referring to

Referee #2:

Gibbs et al. studied how graft-host coupling affects engraftment arrhythmia using computer models. The models are based on experimentally obtained histology images.

Although we know why reduced coupling leads to focal arrhythmia experimentally and computationally (Circ Res. 2017 Dec 8;121(12):1379-1391.), to the best of my knowledge, no one applied it to EA.

The manuscript is well-written in general. Figures are clearly shown (You may need to increase the font size for visibility). However, it is difficult to understand the methods section. Especially 158~227. For example, line 159 "We modeled differences in graft-host coupling using a discontinuous finite element method" : What differences? How modeled? What is the discontinuous FEM? Line 161 "nodes along the boundary were duplicated" : What does this mean? Line 163 "use a stochastic approach" : details of the stochastic approach is not provided. Line 165 "We examined N levels of graft connectedness" : What are N levels? and so on and so forth...

Minor comments:

\*In Fig7A, there is large variability from model 1 to model 5. Do you know why?

\*Which NHP did you use? Macaque?

\*"Leasd" in the title is misspelled.

---

END OF COMMENTS

**Confidential Review**

**06-Jan-2023**

---

The authors performed a computational study investigating the effect of graft-host connectivity and graft conductivity on graft-initiated arrhythmias in human pluripotent stem cell-derived cardiomyocytes grafts in the infarcted ventricle. The study is well presented, and the aims are clear. The results are interesting and provide novel insight into the effect of scar and graft-host connectivity on arrhythmias, with potentially important clinical implications.

However, there are a few points that the authors should clarify:

1. The resting membrane potential the authors obtained ( $\sim -72$  mV) is not consistent with the measured values stated at line 182 ( $-68$  mV,  $-57$  mV). This should either be addressed, or at least added as a limitation to the study, as the rest membrane potential might have important effects on propagation.
2. The authors should perform simulations with slow but conducting scar because that might affect the conclusion of the study, since graft conductivity and scar presence seem to have quite a significant effect on graft-initiated activation.
3. The authors should also mention in the limitations that they did not consider border zone tissue around the scar and that 3D modelling, while more expensive, might show different vulnerable windows and change the results significantly.
4. Do graft myocytes undergo any physiological changes when they become more mature? If not, the authors could provide a reference for that. If not, this should also be listed as a limitation of the study, as the only temporal factor included in the study is increased graft-host connectivity.
5. The manuscript should undergo careful proof-reading.

Minor points:

1. Title: leasd should be lead. This is not correct at line 1 but it is correct in the title page.
2. Line 51: unclear what the authors mean by 'spatial coordinates'. Maybe say location, and add 'location especially relative to scar'.
3. Line 73: 'serious but transitory' could maybe be changed to 'transitory but serious'
4. Line 78: remove comma after hPSC-CM

5. Line 87-91: this sentence would benefit from being rephrased as it is a bit convoluted and hard to follow
6. Figure 1A, left: it might be useful to add a zoomed in area of the graft region
7. The authors should provide how many nodes and elements each model had (for instance at line 130 where they state the mesh resolution)
8. Line 165: 'use' should be 'used'
9. Line 169: 'island-by-island-basis' is unclear at this point. It becomes clearer when looking at Figure 6 where all models are shown, and the reader can clearly appreciate that each model has many islands. This is not clear in Figure 1C, as the model the authors show does not have many islands. Also, the authors might consider changing the blue-green color combination, as the colors can be difficult to distinguish at times.
10. Line 178: can the authors please specify what species the Kernik model was originally developed for? Human, NPH,...
11. Line 180-181: the authors should provide some references for experimental data supporting their (1) claim about faster intrinsic rate
12. Line 182: the word 'heart' is missing after transplanted and maybe 'more positive minimum diastolic potential' should be rewritten as 'less negative minimum diastolic potential'
13. Line 182: -57 mV and -68 mV should be swapped
14. Line 184-189: this sentence is very difficult to follow. Also, the PCR methods and results should be moved from Line 232 to Line 159, as it is a bit out of context where it is now. Moving it to an earlier point in the manuscript would also provide better context for point (3) at line 184
15. Line 196: is 1.9 Hz frequency consistent with any experimental data? The authors should provide a reference for this



16. Line 199: the authors should specify how the cell models were initialised before running the simulations at the tissue scale. Were the modified Kernik and the Ten Tusscher model ran for a number of beats to reach a near steady state?
17. Line 230: just for clarification, the authors should specify that 'maturity' refers to the percentage of host-graft connectivity
18. Line 233: 'were' should be 'was'
19. Line 282: remove the comma after 'myocardium'
20. Line 287: 'isolate' should be 'isolation'
21. Line 292: the '.' After 'For this set of simulations' should be a comma
22. Line 299: the orange dots in Figure 6 are very difficult to see. Maybe an arrow would be more visible?
23. Line 303: remove comma after 'Similarly'
24. Line 306: in the table caption, the table does not present 'statistics' but just the 'model characteristics'
25. Line 314-316: this sentence is hard to follow. Please rephrase
26. Line 321: WOV is already defined as an abbreviation in the methods
27. Figure 7: what does the color on the dots mean? If it does not have any meaning, then the dots should all be the same color. A similar figure should also be shown for Model 5, as that also seemed to be an interesting case
28. Line 358: 'was' should be 'we' and 'see' should be 'saw'
29. Line 368: 'for all conductivities' please add 'of the grafts', as otherwise it is unclear what connectivity the authors are referring to



**REVIEWING EDITOR:** *Both reviewers comment on an interesting study that provides new, clinically relevant insight into the effects of scar and graft-host connectivity on engraftment arrhythmias. The revision should clarify the reviewers' queries, mainly addressing potential limitations and improving description of the methodology. Please also follow the JP principles and standards for reporting animal experiments.*

**SENIOR EDITOR:** *Please add a statement explaining ethical review of animal-derived samples used in this investigation.*

**We thank the editors for their comments. A statement explaining the ethical review of animals has been added.**

**We thank both referees for their questions, comments, and suggestions. The manuscript text and figures have been revised accordingly. All significant changes to the manuscript text are shown in blue.**

**REFEREE #1:** The authors performed a computational study investigating the effect of graft-host connectivity and graft conductivity on graft-initiated arrhythmias in human pluripotent stem cell-derived cardiomyocytes grafts in the infarcted ventricle. The study is well presented, and the aims are clear. The results are interesting and provide novel insight into the effect of scar and graft-host connectivity on arrhythmias, with potentially important clinical implications. However, there are a few points that the authors should clarify:

1. *The resting membrane potential the authors obtained (~ -72 mV) is not consistent with the measured values stated at line 182 (-68 mV, -57 mV). This should either be addressed, or at least added as a limitation to the study, as the rest membrane potential might have important effects on propagation.*

**We appreciate the referee's comment regarding our models resting membrane potential. In modifying the Kernik model, we aimed to make the fewest adjustments possible to reduce the likelihood of model derangement. Nevertheless, the point regarding resting potential is well taken, and text regarding this limitation has been added accordingly (lines 521-526).**

2. *The authors should perform simulations with slow but conducting scar because that might affect the conclusion of the study, since graft conductivity and scar presence seem to have quite a significant effect on graft-initiated activation.*

**We thank the referee for this excellent suggestion. In response, we ran a completely new set of experiments in models with slow-conducting scar (electrical properties based on prior simulation studies, as now described on lines 261-264 in Methods). Unlike non-conductive scar, which creates a barrier to intercellular propagation, slow-conducting scar acts as a pure electrotonic sink, absorbing excitatory current that would have otherwise contributed to membrane depolarization in simulated graft myocytes. This reduced the overall number of graft host excitations in our model compared to non-conductive scar. This point is illustrated in the additions we made to Figs. 7 and 8 as well as in text on lines 372-378 and lines 403-408.**

3. *The authors should also mention in the limitations that they did not consider border zone tissue around the scar and that 3D modelling, while more expensive, might show different vulnerable windows and change the results significantly.*

The referee brings up an important point. We chose to use 2D models instead of 3D because histology images allowed us to include the exact locations of graft, scar, and host myocardium in our models. Inter-slice spacing (~3 mm) in standard histology preparations is too coarse to create reasonable 3D models by aligning and stacking slices (i.e., granularity of spatial features would be much coarser in the Z direction vs. the XY plane, creating a “staircasing” effect). Thus, to use 3D models, we would have had to use synthetic approaches to generate patterns of graft and/or scar. Regarding border zone, the author is correct that we do not modify the underlying ionic currents in host myocardium directly adjacent to scar. However, we would highlight out that our models do have an explicit high-resolution representation of the patchy intermingling of myocardium and infarct in these areas, with a resolution far greater than what could be observed as “gray zone,” for example via LGE-MRI. We have added a condensed version of these interesting points to our discussion section on limitations (lines 504-515).

4. *Do graft myocytes undergo any physiological changes when they become more mature? If not, the authors could provide a reference for that. If not, this should also be listed as a limitation of the study, as the only temporal factor included in the study is increased graft-host connectivity.*

This is a crucial point. It has been shown that as hPSC-CM mature they undergo myofibril alignment and t-tubule formation. Moreover, the cells become electrically quiescent due to increase  $I_{K1}$  expression and down-regulation of  $I_f$  and  $I_{CaT}$ . In our study, because we used computational models in which we can exercise fine-grain control over our parameters, we deliberately explored models in which variables like graft-to-host electrical coupling ( $p_c$ ) were the *only* differences, ruling out other potential confounding factors like changes due to intrinsic cell-scale maturation that could potentially explain EA propensity. Additionally, since the exact changes in EP properties of engrafted cells over time are not yet fully characterized *in vitro*, it would be hard to properly calibrate models attempting to probe their importance to EA at this time. We have added text to our Discussion to reflect these aspects of our study (lines 497-503).

5. *The manuscript should undergo careful proof-reading.*

The submitted manuscript has undergone careful proof-reading by all authors. We thank the referee for pointing out several typos or other errors under Minor Points, which were very helpful guidance in this regard.

Minor points:

*The authors should provide how many nodes and elements each model had (for instance at line 130 where they state the mesh resolution).*

We appreciate the referee for pointing this out. A new table (Table 1) was added to clarify this point.

*Line 169: 'island-by-island-basis' is unclear at this point. It becomes clearer when looking at Figure 6 where all models are shown, and the reader can clearly appreciate that each model has many islands. This is not clear in Figure 1C, as the model the authors show does not have many islands. Also, the authors might consider changing the blue-green color combination, as the colors can be difficult to distinguish at times.*

We thank the referee for bringing this to our attention. To better emphasize this concept of multiple islands, we have outlined each in orange in Figure 1C to increase contrast. We have chosen to keep the blue-green colour combination because we believe it provides a good contrast that is also colourblind friendly (especially important for the senior author, who is extremely colourblind).

*Line 178: can the authors please specify what species the Kernik model was originally developed for? Human, NPH.*

We thank the referee for this question. The Kernik model was originally developed as a model of human induced pluripotent stem cell-derived cardiomyocytes at the cellular scale. This information is provided on line 213.

*Line 180-181: the authors should provide some references for experimental data supporting their (1) claim about faster intrinsic rate. [...] Line 196: is 1.9 Hz frequency consistent with any experimental data? The authors should provide a reference for this.*

We thank the referee for this suggestion. Currently, we are unaware of published *in vitro* data that document a faster intrinsic beating rate in hPSC-CM. However, since the rates of tachycardias observed in animals during EA can be as fast as ~5 Hz, we believe it is justified to increase the beating rate of the cell-scale model and impose a less negative MDP. As expressed on lines 215-216, the rationale for these changes was to create a more accurate representation of what is occurring *in vivo*.

*Line 199: the authors should specify how the cell models were initialised before running the simulations at the tissue scale. Were the modified Kernik and the Ten Tusscher model ran for a number of beats to reach a near steady state?*

The referee's point is well taken. In the interest of model reproducibility, we used identical initial conditions to published values for both ionic models (including in the Kernik model, with modifications to key conductance parameters as described elsewhere). No additional beats were run to reach a steady state for either model. This key information is provided on lines 235-236 of our revised manuscript.

*Line 230: just for clarification, the authors should specify that 'maturity' refers to the percentage of host-graft connectivity.*

We thank the referee for this point of clarification. We have replaced the word "maturity" on line 270 with *pc* (graft-host connectedness level).

*Line 299: the orange dots in Figure 6 are very difficult to see. Maybe an arrow would be more visible?*

We thank the referee for bringing this to our attention. We have changed the marker to a grey asterisk and increased the size.

*Figure 7: what does the color on the dots mean? If it does not have any meaning, then the dots should*

all be the same color. A similar figure should also be shown for Model 5, as that also seemed to be an interesting case.

**We thank the referee for this feedback. All points in figure 7 are now yellow to improve clarity and a column showing Model 5 was added.**

#### *Additional Minor Points*

- *Title: leasd should be lead. This is not correct at line 1 but it is correct in the title page.*
- *Line 51: unclear what the authors mean by 'spatial coordinates'. Maybe say location, and add 'location especially relative to scar'.*
- *Line 73: 'serious but transitory' could maybe be changed to 'transitory but serious'.*
- *Line 78: remove comma after hPSC-CM*
- *Line 87-91: this sentence would benefit from being rephrased as it is a bit convoluted and hard to follow.*
- *Line 165: 'use' should be 'used'*
- *Line 182: the word 'heart' is missing after transplanted and maybe 'more positive minimum diastolic potential' should be rewritten as 'less negative minimum diastolic potential'*
- *Line 184-189: this sentence is very difficult to follow. Also, the PCR methods and results should be moved from Line 232 to Line 159, as it is a bit out of context where it is now. Moving it to an earlier point in the manuscript would also provide better context for point (3) at line 184.*
- *Line 182: -57 mV and -68 mV should be swapped*
- *Line 233: 'were' should be 'was'*
- *Line 282: remove the comma after 'myocardium'*
- *Line 287: 'isolate' should be 'isolation'*
- *Line 292: the '.' After 'For this set of simulations' should be a comma*
- *Line 303: remove comma after 'Similarly'*
- *Line 306: in the table caption, the table does not present 'statistics' but just the 'model characteristics'*
- *Line 314-316: this sentence is hard to follow. Please rephrase.*
- *Line 321: WOV is already defined as an abbreviation in the methods*
- *Line 358: 'was' should be 'we' and 'see' should be 'saw'*
- *Line 368: 'for all conductivities' please add 'of the grafts', as otherwise it is unclear what connectivity the authors are referring to*

**We thank the referee for pointing out these issues. They have all been corrected or clarified as suggested.**

**REFEREE #2:** Gibbs et al. studied how graft-host coupling affects engraftment arrhythmia using computer models. The models are based on experimentally obtained histology images. Although we know why reduced coupling leads to focal arrhythmia experimentally and computationally (Circ Res. 2017 Dec 8;121(12):1379-1391.), to the best of my knowledge, no one applied it to EA.

*The manuscript is well-written in general. Figures are clearly shown (You may need to increase the font size for visibility). However, it is difficult to understand the methods section. Especially 158~227. For example, line 159 "We modeled differences in graft-host coupling using a discontinuous finite element method" : What differences? How modeled? What is the discontinuous FEM? Line 161 "nodes along the boundary were duplicated" : What does this mean? Line 163 "use a stochastic approach" : details*

*of the stochastic approach is not provided. Line 165 "We examined N levels of graft connectedness" : What are N levels? and so on and so forth...*

**We appreciate the referee's comments and concern regarding our methods. The first address the concern on line 159, we added a new component to Figure 3 to help visually clarify what is being changed when we modify graft-host coupling. Elsewhere, throughout the Methods section (with particular focus on the examples highlighted by the referee) we have revised for clarity and we have included as much detail as possible, towards the goal of making our work reproducible.**

Minor comments:

*\*In Fig7A, there is large variability from model 1 to model 5. Do you know why?*

**We thank the referee for this observation and question. As explained in Methods, the models came from two different animals and the short axis slices were taken from different parts of the heart (i.e., some were more apical while others were more basal). As such, some of the variability is attributable to differences in MI location and size, how many cells engrafted in the heart of each animal, details of cardiac anatomy, and locations of the slices with respect to cell injection sites. In Model 5 it notably appears that the upper left graft seemed to be localized around a vein. We have added a condensed version of this interesting discussion to our revised manuscript (lines 432-435).**

*\*Which NHP did you use? Macaque?*

**We thank the referee for this question. The images used in this study came from Macaques. Clarification was added on line 133.**

*\*"Leasd" in the title is misspelled.*

**We thank the referee for bringing this to our attention. It has been corrected.**

Dear Dr Boyle,

Re: JP-RP-2023-284244R1 "Graft-Host Coupling Changes Can Lead to Engraftment Arrhythmia: A Computational Study" by Chelsea E Gibbs, Silvia Marchianó, Kelly Zhang, Xiulan Yang, Charles E Murry, and Patrick M Boyle

Thank you for submitting your manuscript to The Journal of Physiology. It has been assessed by a Reviewing Editor and by 2 expert referees and we are pleased to tell you that it is acceptable for publication following satisfactory minor revision.

Please advise your co-authors of this decision as soon as possible.

The referee reports are copied at the end of this email.

Please address all the points raised and incorporate all requested revisions or explain in your Response to Referees why a change has not been made. We hope you will find the comments helpful and that you will be able to return your revised manuscript within 4 weeks. If you require longer than this, please contact journal staff: [jp@physoc.org](mailto:jp@physoc.org).

Your revised manuscript should be submitted online using the link in your Author Tasks: Link Not Available. This link is accessible via your account as Corresponding Author; it is not available to your co-authors. If this presents a problem, please contact journal staff ([jp@physoc.org](mailto:jp@physoc.org)). Image files from the previous version are retained on the system. Please ensure you replace or remove any files that are being revised.

If you do not wish to submit a revised version of your manuscript, you must inform our journal staff ([jp@physoc.org](mailto:jp@physoc.org)) or reply to this email to request withdrawal. Please note that a manuscript must be formally withdrawn from the peer review process at one journal before it may be submitted to another journal.

**TRANSPARENT PEER REVIEW POLICY:** To improve the transparency of its peer review process, The Journal of Physiology publishes online as supporting information the peer review history of all articles accepted for publication. Readers will have access to decision letters, including Editors' comments and referee reports, for each version of the manuscript, as well as any author responses to peer review comments. Referees can decide whether or not they wish to be named on the peer review history document.

**ABSTRACT FIGURES:** Authors are expected to use The Journal's premium BioRender account to create/redraw their Abstract Figures. Information on how to access this account is here: <https://physoc.onlinelibrary.wiley.com/journal/14697793/biorender-access>.

This will enable Authors to create and download high-resolution figures. If authors have used the free BioRender service, they can use the instructions provided in the link above to download a high-resolution version suitable for publication.

The link provided should only be used for the purposes of this submission. Authors will be charged for figures created on this account if they are not related to this manuscript submission.

**LANGUAGE EDITING AND SUPPORT FOR PUBLICATION:** If you would like help with English language editing, or other article preparation support, Wiley Editing Services offers expert help, including English Language Editing, as well as translation, manuscript formatting, and figure formatting at [www.wileyauthors.com/eeo/preparation](http://www.wileyauthors.com/eeo/preparation). You can also find resources for Preparing Your Article for general guidance about writing and preparing your manuscript at [www.wileyauthors.com/eeo/prepresources](http://www.wileyauthors.com/eeo/prepresources).

#### REVISION CHECKLIST:

Check that your Methods section conforms to journal policy: [https://jp.msubmit.net/cgi-bin/main.plex?form\\_type=display\\_requirements#methods](https://jp.msubmit.net/cgi-bin/main.plex?form_type=display_requirements#methods).

Check that data presented conforms to the statistics policy: [https://jp.msubmit.net/cgi-bin/main.plex?form\\_type=display\\_requirements#statistics](https://jp.msubmit.net/cgi-bin/main.plex?form_type=display_requirements#statistics).

Upload a full Response to Referees file. To create your 'Response to Referees' copy all the reports, including any comments from the Senior and Reviewing Editors, into a Microsoft Word, or similar, file and respond to each point, using font or background colour to distinguish comments and responses and upload as the required file type.

Please upload two versions of your manuscript text: one with all relevant changes highlighted and one clean version with no changes tracked. The manuscript file should include all tables and figure legends, but each figure/graph should be uploaded as separate, high-resolution files.

You may also upload:

- 'Potential Cover Art' for consideration as the issue's cover image



- Appropriate Supporting Information (Video, audio or data set: see [https://jp.msubmit.net/cgi-bin/main.plex?form\\_type=display\\_requirements#supp](https://jp.msubmit.net/cgi-bin/main.plex?form_type=display_requirements#supp)).

We look forward to receiving your revised submission.

If you have any queries, please reply to this email and we will be pleased to advise.

Yours sincerely,

Peter Kohl  
Senior Editor  
The Journal of Physiology

-----  
**REQUIRED ITEMS**

-Papers must comply with the Statistics Policy [https://jp.msubmit.net/cgi-bin/main.plex?form\\_type=display\\_requirements#statistics](https://jp.msubmit.net/cgi-bin/main.plex?form_type=display_requirements#statistics)

In summary:

-If  $n \leq 30$ , all data points must be plotted in the figure in a way that reveals their range and distribution. A bar graph with data points overlaid, a box and whisker plot or a violin plot (preferably with data points included) are acceptable formats.

-If  $n > 30$ , then the entire raw dataset must be made available either as supporting information, or hosted on a not-for-profit repository e.g. FigShare, with access details provided in the manuscript.

- $n$  clearly defined (e.g.  $x$  cells from  $y$  slices in  $z$  animals) in the Methods. Authors should be mindful of pseudoreplication.

-All relevant  $n$  values must be clearly stated in the main text, figures and tables, and the Statistical Summary Document (required upon revision)

-The most appropriate summary statistic (e.g. mean or median and standard deviation) must be used. Standard Error of the Mean (SEM) alone is not permitted.

-Exact  $p$  values must be stated. Authors must not use 'greater than' or 'less than'. Exact  $p$  values must be stated to three significant figures even when 'no statistical significance' is claimed.

-Statistics Summary Document completed appropriately upon revision

-----  
**EDITOR COMMENTS**

Reviewing Editor:

Congratulations on a nice paper. Please note that statistics information needs to be revised to comply with the JP policy.

Standard Deviation (SD) must be used instead of Standard Error of the Mean (SEM). Please state precise  $P$  values.

-----  
**REFEREE COMMENTS**

Referee #1:

I have no additional comments.

Referee #2:

All of my comments have been addressed appropriately. I have no additional comments.

---

END OF COMMENTS

**1st Confidential Review**

**14-Mar-2023**

---



**Reviewing Editor:** Congratulations on a nice paper. Please note that statistics information needs to be revised to comply with the JP policy. Standard Deviation (SD) must be used instead of Standard Error of the Mean (SEM). Please state precise P values.

**We thank the editor for bring this to our attention. We have updated the figure legend on line 240 to show mean (SD) and added exact p values to figure 4B. We have also provided a new statistical summary table using SD.**

## **REFEREE COMMENTS**

**We thank both referees for their time.**

Referee #1:

I have no additional comments.

Referee #2:

All of my comments have been addressed appropriately. I have no additional comments.

Dear Dr Boyle,

Re: JP-RP-2023-284244R2 "Graft-Host Coupling Changes Can Lead to Engraftment Arrhythmia: A Computational Study" by Chelsea E Gibbs, Silvia Marchianó, Kelly Zhang, Xiulan Yang, Charles E Murry, and Patrick M Boyle

Congratulations and many thanks for submitting your work to JP!

We are pleased to tell you that your paper has been accepted for publication in The Journal of Physiology.

**TRANSPARENT PEER REVIEW POLICY:** To improve the transparency of its peer review process, The Journal of Physiology publishes online as supporting information the peer review history of all articles accepted for publication. Readers will have access to decision letters, including Editors' comments and referee reports, for each version of the manuscript, as well as any author responses to peer review comments. Referees can decide whether or not they wish to be named on the peer review history document.

The last Word (or similar) version of the manuscript provided will be used by the Production Editor to prepare your proof. When this is ready you will receive an email containing a link to Wiley's Online Proofing System. The proof should be thoroughly checked and corrected as promptly as possible.

Authors should note that it is too late at this point to offer corrections prior to proofing. The accepted version will be published online, ahead of the copy edited and typeset version being made available. Major corrections at proof stage, such as changes to figures, will be referred to the Editors for approval before they can be incorporated. Only minor changes, such as to style and consistency, should be made at proof stage. Changes that need to be made after proof stage will usually require a formal correction notice.

All queries at proof stage should be sent to: TJP@wiley.com.

Are you on Twitter? Once your paper is online, why not share your achievement with your followers? Please tag The Journal (@jphysiol) in any tweets and we will share your accepted paper with our 30,000 followers!

Yours sincerely,

Peter Kohl  
Senior Editor  
The Journal of Physiology

P.S. - You can help your research get the attention it deserves! Check out Wiley's free Promotion Guide for best-practice recommendations for promoting your work at [www.wileyauthors.com/eoo/guide](http://www.wileyauthors.com/eoo/guide). You can learn more about Wiley Editing Services which offers professional video, design, and writing services to create shareable video abstracts, infographics, conference posters, lay summaries, and research news stories for your research at [www.wileyauthors.com/eoo/promotion](http://www.wileyauthors.com/eoo/promotion).

**IMPORTANT NOTICE ABOUT OPEN ACCESS:** To assist authors whose funding agencies mandate public access to published research findings sooner than 12 months after publication, The Journal of Physiology allows authors to pay an Open Access (OA) fee to have their papers made freely available immediately on publication.

The Corresponding Author will receive an email from Wiley with details on how to register or log-in to Wiley Authors Services where you will be able to place an order.

You can check if your funder or institution has a Wiley Open Access Account here: <https://authorservices.wiley.com/author-resources/Journal-Authors/licensing-and-open-access/open-access/author-compliance-tool.html>.

-----

#### EDITOR COMMENTS

Reviewing Editor:

Thank you!

Senior Editor:

Congratulations and many thanks for submitting your work to JP!
