# Supplementary material
Source: PubMed Central journal article supplement (PMC10901678)
Supplement: NIHMS1966318-supplement-Statistical_summary__as_published_with_article.pdf [file NIHMS1966318-supplement-Statistical_summary__as_published_with_article.pdf]

# The Journal of Physiology Statistical Summary Document

**Manuscript Title:** Graft-Host Coupling Changes Can Lead to Engraftment Arrhythmia: A Computational Study

**Authors:** Chelsea E. Gibbs, Silvia Marchianó, Kelly Zhang, Xiulan Yang, Charles E. Murry, and Patrick M. Boyle

**Animal model used, if applicable:** N/A

**Underlying hypothesis:** This investigation tests the hypothesis that KCNJ2 expression levels are much lower than HCN4, CACNA1H, and SLC8A1 in human pluripotent stem cell derived cardiomyocytes (hPSC-CM WT).

**Definitions of 'n':**

Question 1: n = independent biological replicates

**Statistical summary table:**

| Experimental question number*                                                | Finding/conclusion | Experimental location/variable<br>e.g. muscle, neocortex or genotype | Mean value<br>(or other summary statistic) | SD   | n val. | P**           | Units | Data comparisons<br>e.g. WT vs KO | Statistical test | Any other variable<br>e.g. subjects' age or sex | Figure/table in which data are presented | Comments<br>e.g. observation           |
|------------------------------------------------------------------------------|--------------------|----------------------------------------------------------------------|--------------------------------------------|------|--------|---------------|-------|-----------------------------------|------------------|-------------------------------------------------|------------------------------------------|----------------------------------------|
| 1. What is the difference in expression between HCN4, KCNJ2, CACNA1H, SLC8A1 | Yes                | hPSC-CM WT (HCN4)                                                    | 1689                                       | 641  | 3      | <b>0.0079</b> | Fig 4 | %HPRT                             | HCN4 vs KCNJ2    | One-way ANOVA with Sidak correction             |                                          | Anova Summary: F=24.9, R square =0.903 |
|                                                                              | Yes                | hPSC-CM WT (KCNJ2)                                                   | 9                                          | 9.54 | 3      | <b>0.0126</b> | Fig 4 | %HPRT                             | HCN4 vs CACNA1H  |                                                 |                                          |                                        |
|                                                                              | No                 | hPSC-CM WT (CACNA1H)                                                 | 135                                        | 8.14 | 3      | 0.2221        | Fig 4 | %HPRT                             | HCN4 vs SLC8A1   |                                                 |                                          |                                        |

The Journal of  
**Physiology** Statistical Summary Document

---

|  |     |                     |      |     |   |               |       |       |                   |  |  |  |
|--|-----|---------------------|------|-----|---|---------------|-------|-------|-------------------|--|--|--|
|  | No  | hPSC-CM WT (SLC8A1) | 2536 | 563 | 3 | 0.9996        | Fig 4 | %HPRT | KCNJ2 vs CACNA1H  |  |  |  |
|  | Yes |                     |      |     |   | <b>0.0005</b> | Fig 4 | %HPRT | KCNJ2 vs SLC8A1   |  |  |  |
|  | Yes |                     |      |     |   | <b>0.0008</b> | Fig 4 | %HPRT | CACNA1H vs SLC8A1 |  |  |  |
